# Supplementary material for: Rickettsia sibirica mongolitimonae Infection, France, 2010–2014
Source: PubMed Central journal article supplement (PMC4861502; doi:10.3201/eid2205.141989), 2016-05
Supplement: 14-1989-Techapp-s1.pdf [file 14-1989-Techapp-s1.pdf]

# *Rickettsia sibirica mongolitimonae* Infection, France, 2010–2014

## Technical Appendix

**Technical Appendix Table 1.** Epidemiologic, clinical, and microbiological characteristics associated with patients infected with *Rickettsia sibirica mongolitimonae*

| Case  | Sex | Age | Animal contact | Fever         | Lymphadenopathy       | Eschar             | Laboratory data                                                             | Other                               | Serology (IgM/IgG) |                    | Treatment             |
|-------|-----|-----|----------------|---------------|-----------------------|--------------------|-----------------------------------------------------------------------------|-------------------------------------|--------------------|--------------------|-----------------------|
|       |     |     |                |               |                       |                    |                                                                             |                                     | First serum        | Convalescence      |                       |
| 1     | M   | 50  | Dogs           | Yes (2 weeks) | No                    | Left Hand          | ALT: 79 IU/L; AST: 70 IU/L; platelets: 59x 10 <sup>9</sup> /L               | Intensive care unit hospitalization | Negative           | Positive (64/128)  | Doxycycline (2 weeks) |
| 2     | M   | 36  | Horses         | Yes           | Inguinal              | Left foot          | NP                                                                          | Cough, rope-like lymphangitis       | Negative           | NR                 | Doxycycline (10 d)    |
| 3     | M   | 30  | No             | Yes           | No                    | Right leg          | ALT: 61 IU/L; AST: 54 IU/L; platelets: 107x 10 <sup>9</sup> /L              | No                                  | NR                 | NR                 | Doxycycline (1 week)  |
| 4     | F   | 58  | Dogs           | Yes (10 d)    | Cervical              | Neck               | ALT: 50 IU/L; AST: 47 IU/L; platelets: 137x 10 <sup>9</sup> /L; Stp: 56 g/L | Confusion                           | Negative           | NR                 | Doxycycline (1 week)  |
| 5     | M   | 31  | No             | Yes           | Axillary and cervical | Back               | NP                                                                          | Rope like lymphangitis              | NR                 | NR                 | Doxycycline (1 week)  |
| 6     | M   | 17  | Dogs           | Yes           | Cervical              | Neck               | NP                                                                          | No                                  | Negative           | Positive (128/128) | Amox and then doxy    |
| 7     | F   | 50  | No             | Yes           | Inguinal              | Thigh              | NP                                                                          | No                                  | Negative           | Negative           | Doxycycline (1 week)  |
| 8 (1) | M   | 19  | Dogs           | Yes (4 d)     | Cervical              | Eyelid             | NP                                                                          | No                                  | Negative           | Positive (128/64)  | Doxycycline (1 week)  |
| 9     | F   | 29  | No             | Yes           | Inguinal              | Righ foot          | NP                                                                          | Rope like lymphangitis              | NR                 | NR                 | Pristinamycine (7 d)  |
| 10    | M   | 70  | No             | Yes           | Axillary              | Left hypochondrium | NP                                                                          | No                                  | Negative           | NR                 | Doxycycline (1 week)  |
| 11    | M   | 67  | Dogs           | Yes (10 d)    | Cervical              | Neck               | NP                                                                          | No                                  | Negative           | NR                 | Doxycycline (10 d)    |
| 12    | F   | 63  | No             | Yes (7 d)     | Axillary              | Left Hand          | NP                                                                          | No                                  | Negative           | Positive (128/32)  | Doxycycline (1 week)  |
| 13    | F   | 40  | No             | Yes (15 d)    | No                    | Right costal       | ALT: 45 IU/L; AST: 49 IU/L; platelets: 97x 10 <sup>9</sup> /L; Stp: 58 g/L  | No                                  | Positive (128/32)  | NR                 | Doxycycline (2weeks)  |

| Case   | Sex | Age | Animal contact | Fever     | Lymphadenopathy | Eschar                | Laboratory data                                                | Other                  | Serology (IgM/IgG) |               | Treatment            |
|--------|-----|-----|----------------|-----------|-----------------|-----------------------|----------------------------------------------------------------|------------------------|--------------------|---------------|----------------------|
|        |     |     |                |           |                 |                       |                                                                |                        | First serum        | Convalescence |                      |
| 14     | F   | 76  | No             | Yes       | No              | Neck                  | NP                                                             | No                     | NR                 | NR            | Doxycycline (1 week) |
| 15     | M   | 47  | No             | Yes (7 d) | Cervical        | Left Hand             | NP                                                             | Rope like lymphangitis | Negative           | NR            | Doxycycline (1 week) |
| 16     | M   | 57  | No             | Yes       | No              | 3 eschars in the hand | NP                                                             | No                     | Negative           | NR            | Doxycycline          |
| 17 (2) | F   | 67  | No             | Yes       | No              | Left leg              | NP                                                             | Rope like lymphangitis | Positive (64/64)   | NR            | Doxycycline (1 week) |
| 18     | M   | 28  | No             | Yes       | No              | Chest                 | ALT: 55 IU/L; AST: 48 IU/L; platelets: 115x 10 <sup>9</sup> /L | Rope like lymphangitis | NR                 | NR            | Doxycycline (1 week) |
| 19     | M   | 2   | No             | Yes       | No              | Ear                   | NP                                                             | No                     | NR                 | NR            | Doxycycline (1 week) |
| 20     | F   | 10  | No             | Yes       | Popliteal       | Left leg              | NP                                                             | Rope like lymphangitis | NR                 | NR            | Doxycycline (1 week) |

\*NR, not received; NP, not provided; ALT, alanine aminotransferase; AST, aspartate aminotransferase; Stp, serum total protein.

**Technical Appendix Table 2.** Previous reported cases of *Rickettsia sibirica mongolotimonae*\*

| Year- Reference | Number of cases | Country      | Rope-like lymphangitis (No. cases, %) | Eschar (No. cases, %) | Rash (No. cases, %) | Other              |
|-----------------|-----------------|--------------|---------------------------------------|-----------------------|---------------------|--------------------|
| 1996 - (1)      | 1               | France       | No                                    | Yes (1, 100%)         | Yes (1, 100%)       |                    |
| 2000 - (2)      | 1               | France       | Yes (1, 100%)                         | Yes (1, 100%)         | No                  |                    |
| 2004 - (3)      | 1               | South Africa | Yes (1, 100%)                         | Yes (1, 100%)         | No                  |                    |
| 2005 - (4)      | 7               | France       | Yes (3, 43%)                          | Yes (6, 86%)          | Yes (6, 86%)        |                    |
| 2005 - (5)      | 1               | Greece       | No                                    | Yes (1, 100%)         | Yes (1, 100%)       |                    |
| 2006 - (6)      | 1               | Portugal     | No                                    | Yes (1, 100%)         | Yes (1, 100%)       |                    |
| 2008 - (7)      | 1               | Spain        | No                                    | Yes (1, 100%)         | No                  |                    |
| 2008 - (8)      | 1               | Portugal     | Yes (1, 100%)                         | Yes (1, 100%)         | Yes (1, 100%)       |                    |
| 2008 - (9)      | 1               | France       | Yes (1, 100%)                         | Yes (1, 100%)         | Yes (1, 100%)       | Retinal vasculitis |
| 2010 - (10)     | 1               | Egypt        | No                                    | Yes (1, 100%)         | No                  |                    |
| 2011 - (11, 12) | 2               | Spain        | No                                    | Yes (2, 100%)         | Yes (1, 100%)       |                    |
| 2012 - (13)     | 2               | Algeria      | NP                                    | NP                    | NP                  |                    |
| 2012 - (11)     | 1               | Spain        | No                                    | Yes (1, 100%)         | Yes (1, 100%)       | septic shock       |
| 2013 - (14)     | 6               | Spain        | Yes (3, 50%)                          | Yes (6, 100%)         | Yes (4, 67%)        |                    |
| 2013 - (15)     | 2               | France       | Yes (1, 50%)                          | Yes (2, 100%)         | Yes (1, 50%)        |                    |
| 2014 - (16)     | 1               | France       | No                                    | Yes (1, 100%)         | No                  |                    |
| Total           | 30              |              | 11 (37%)                              | 27 (90%)              | 18 (60%)            |                    |

## References

1. Raoult D, Brouqui P, Roux V. A new spotted-fever-group rickettsiosis. *Lancet*. 1996;348:412. [PubMed http://dx.doi.org/10.1016/S0140-6736\(05\)65037-4](http://dx.doi.org/10.1016/S0140-6736(05)65037-4)
2. Fournier PE, Tissot-Dupont H, Gallais H, Raoult D. *Rickettsia mongolotimonae*: a rare pathogen in France. *Emerg Infect Dis*. 2000;6:290–2. [PubMed http://dx.doi.org/10.3201/eid0603.000309](http://dx.doi.org/10.3201/eid0603.000309)
3. Pretorius AM, Birtles RJ. *Rickettsia mongolotimonae* infection in South Africa. *Emerg Infect Dis*. 2004;10:125–6. [PubMed http://dx.doi.org/10.3201/eid1001.020662](http://dx.doi.org/10.3201/eid1001.020662)
4. Fournier PE, Gouriet F, Brouqui P, Lucht F, Raoult D. Lymphangitis-associated rickettsiosis, a new rickettsiosis caused by *Rickettsia sibirica mongolotimonae*: seven new cases and review of the literature. *Clin Infect Dis*. 2005;40:1435–44. [PubMed http://dx.doi.org/10.1086/429625](http://dx.doi.org/10.1086/429625)
5. Psaroulaki A, Germanakis A, Gikas A, Scoulica E, Tselentis Y. Simultaneous detection of “*Rickettsia mongolotimonae*” in a patient and in a tick in Greece. *J Clin Microbiol*. 2005;43:3558–9. [PubMed http://dx.doi.org/10.1128/JCM.43.7.3558-3559.2005](http://dx.doi.org/10.1128/JCM.43.7.3558-3559.2005)
6. de Sousa R, Barata C, Vitorino L, Santos-Silva\_M, Carrapato\_C, Torgal\_J, et al. *Rickettsia sibirica* isolation from a patient and detection in ticks, Portugal. *Emerg Infect Dis*. 2006;12:1103–8. [PubMed http://dx.doi.org/10.3201/eid1207.051494](http://dx.doi.org/10.3201/eid1207.051494)
7. Aguirrebengoa K, Portillo A, Santibanez S, Marin JJ, Montejo M, Oteo JA. Human *Rickettsia sibirica mongolotimonae* infection, Spain. *Emerg Infect Dis*. 2008;14:528–9. [PubMed http://dx.doi.org/10.3201/eid1403.070987](http://dx.doi.org/10.3201/eid1403.070987)
8. de Sousa R, Duque L, Anes M, Pocas J, Torgal J, Bacellar F, et al. Lymphangitis in a Portuguese patient infected with *Rickettsia sibirica*. *Emerg Infect Dis*. 2008;14:529–30. [PubMed http://dx.doi.org/10.3201/eid1403.070680](http://dx.doi.org/10.3201/eid1403.070680)
9. Caron J, Rolain JM, Mura F, Guillot B, Raoult D, Bessis D. *Rickettsia sibirica* subsp. *mongolotimonae* infection and retinal vasculitis. *Emerg Infect Dis*. 2008;14:683–4. [PubMed http://dx.doi.org/10.3201/eid1404.070859](http://dx.doi.org/10.3201/eid1404.070859)

10. Socolovschi C, Barbarot S, Lefebvre M, Parola P, Raoult D. *Rickettsia sibirica mongolitimonae* in traveler from Egypt. Emerg Infect Dis. 2010;16:1495–6. [PubMed http://dx.doi.org/10.3201/eid1609.100258](http://dx.doi.org/10.3201/eid1609.100258)
11. Ibarra V, Portillo A, Palomar AM, Sanz\_MM, Metola\_L, Blanco\_JR, et al. Septic shock in a patient infected with *Rickettsia sibirica mongolitimonae*, Spain. Clin Microbiol Infect. 2012;18:E283–5. [PubMed http://dx.doi.org/10.1111/j.1469-0691.2012.03887.x](http://dx.doi.org/10.1111/j.1469-0691.2012.03887.x)
12. Fleta-Asín B, Alonso-Castro L, Jado-Garcia I, Anda-Fernandez P. Detection by polymerase chain reaction of *Rickettsia sibirica mongolotimonae* in the skin biopsy of a rash: a case report. Enferm Infecc Microbiol Clin. 2011;29:778–9. [PubMed](http://dx.doi.org/10.1111/j.1469-0691.2012.03887.x)
13. Mokrani K, Tebbal S, Raoult D, Fournier PE. Human rickettsioses in the Batna area, eastern Algeria. Ticks Tick Borne Dis. 2012;3:364–6. [PubMed http://dx.doi.org/10.1016/j.ttbdis.2012.10.017](http://dx.doi.org/10.1016/j.ttbdis.2012.10.017)
14. Ramos JM, Jado I, Padilla S, Masia M, Anda P, Gutierrez F. Human infection with *Rickettsia sibirica mongolitimonae*, Spain, 2007–2011. Emerg Infect Dis. 2013;19:267–9. [PubMed http://dx.doi.org/10.3201/eid1902.111706](http://dx.doi.org/10.3201/eid1902.111706)
15. Edouard S, Parola P, Socolovschi C, Davoust B, La Scola B, Raoult D. Clustered cases of *Rickettsia sibirica mongolitimonae* infection, France. Emerg Infect Dis. 2013;19:337–8. [PubMed http://dx.doi.org/10.3201/eid1902.120863](http://dx.doi.org/10.3201/eid1902.120863)
16. Solary J, Socolovschi C, Aubry C, Brouqui P, Raoult D, Parola P. Detection of *Rickettsia sibirica mongolitimonae* by using cutaneous swab samples and quantitative PCR. Emerg Infect Dis. 2014;20:716–8. [PubMed http://dx.doi.org/10.3201/eid2004.130575](http://dx.doi.org/10.3201/eid2004.130575)
